# Supplementary material
Source: PubMed Central journal article supplement (PMC6994112)
Supplement: jci-130-132779-s183.pdf [file jci-130-132779-s183.pdf]

1 **Supplemental Figures and Table**

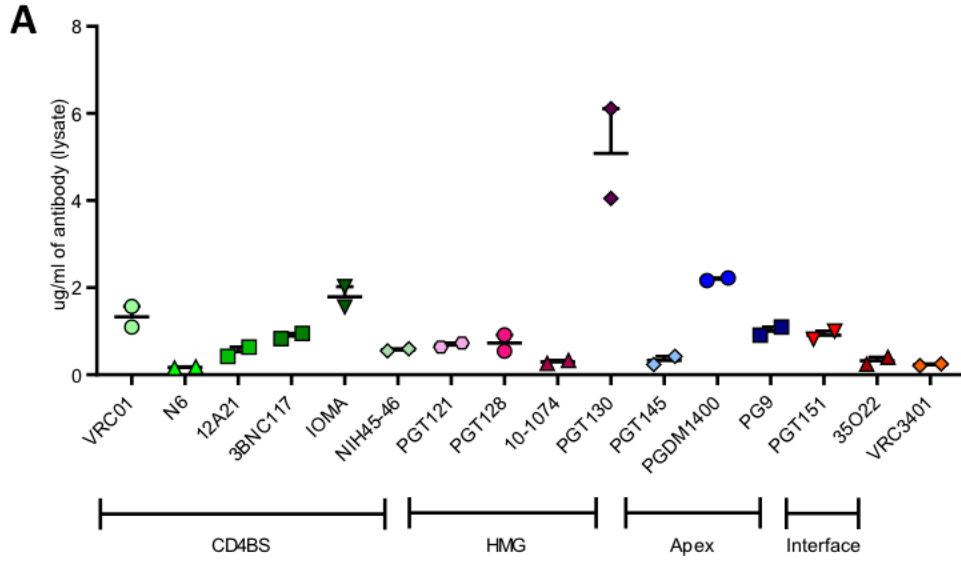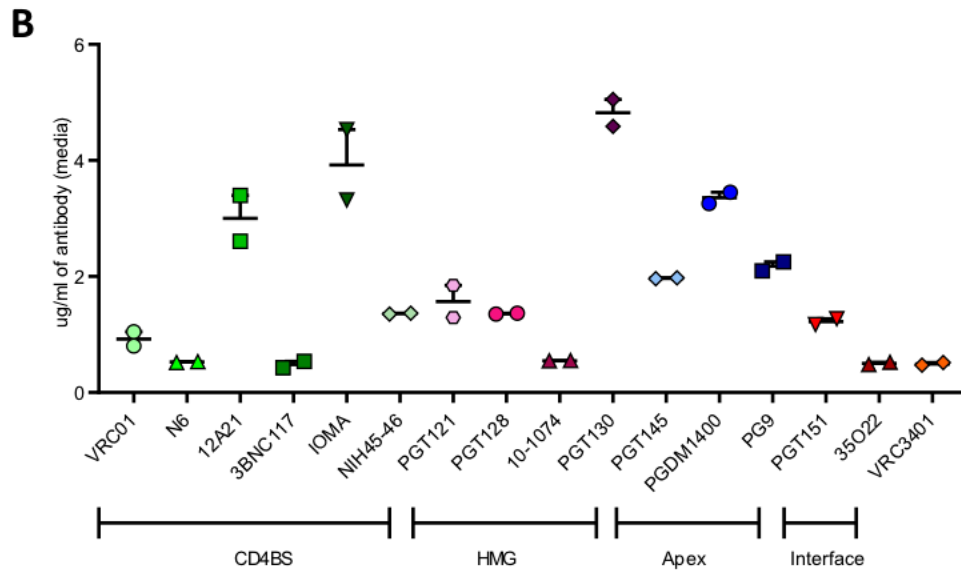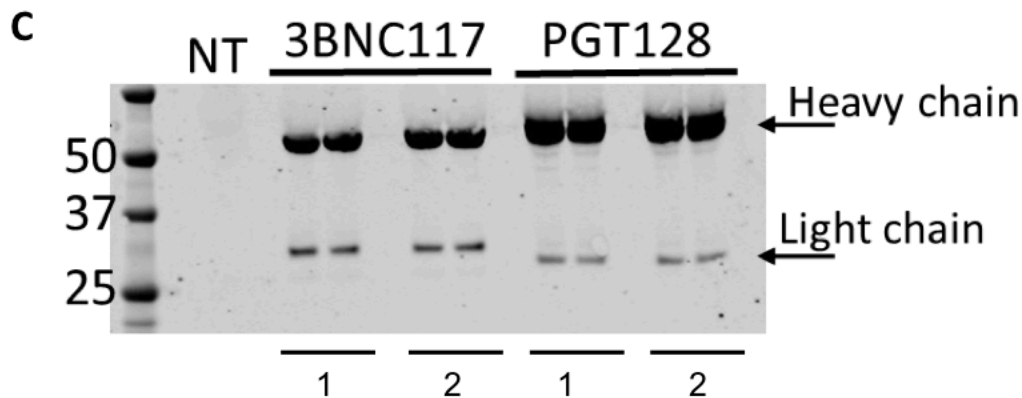

3 **Figure S1:** *In vitro* expression of various HIV-1 specific dMAbs. HEK293T cells were transiently transfected  
4 with plasmid dMAb constructs expressing 16 HIV-1 antibodies. Quantification of human IgG expression in  
5 cell lysate (**A**) and supernatant (media) (**B**) using two technical replicates but representative of two  
6 experimental replicates. (**C**) Example Western blot of two dMAbs, 3BNC117 and PGT128, in the media of  
7 transfected cells demonstrating expression of both the heavy and light chain. Lanes 1 and 2 for each dMAb  
8 were biological replicates.

9

10

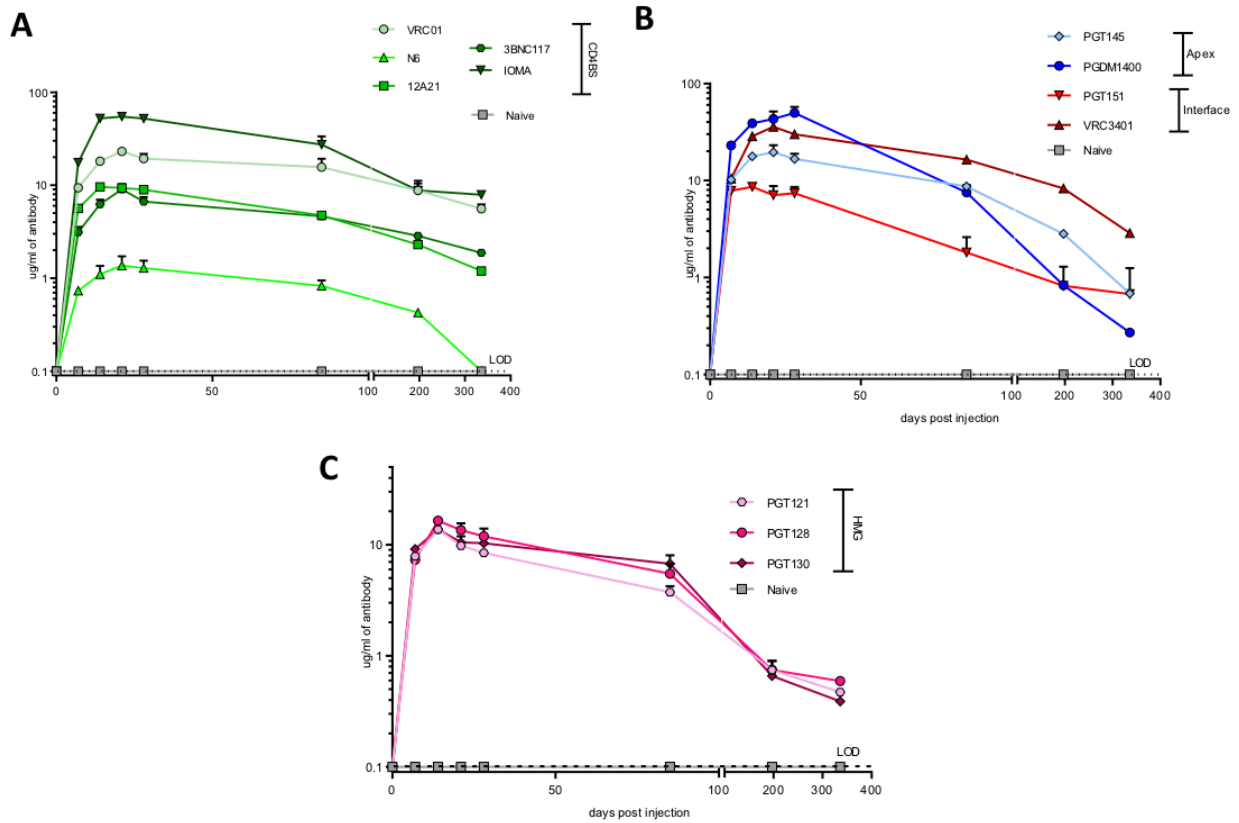

11

12 **Figure S2:** Time course expression of the CD4bs, Apex, HMG and Interface dMAbs in mice. Groups of  
 13 mice (n=5) were transiently immunodepleted and delivered various dMAbs. Expression of dMAbs in the  
 14 serum was followed over time for the CD4bs (A), apex and interface (B) and high mannose glycan (C)  
 15 dMAbs as well as for naïve mice. Dots represent mean expression with bars displaying the standard  
 16 error of the mean. Representative of two experimental replicates.

**A**

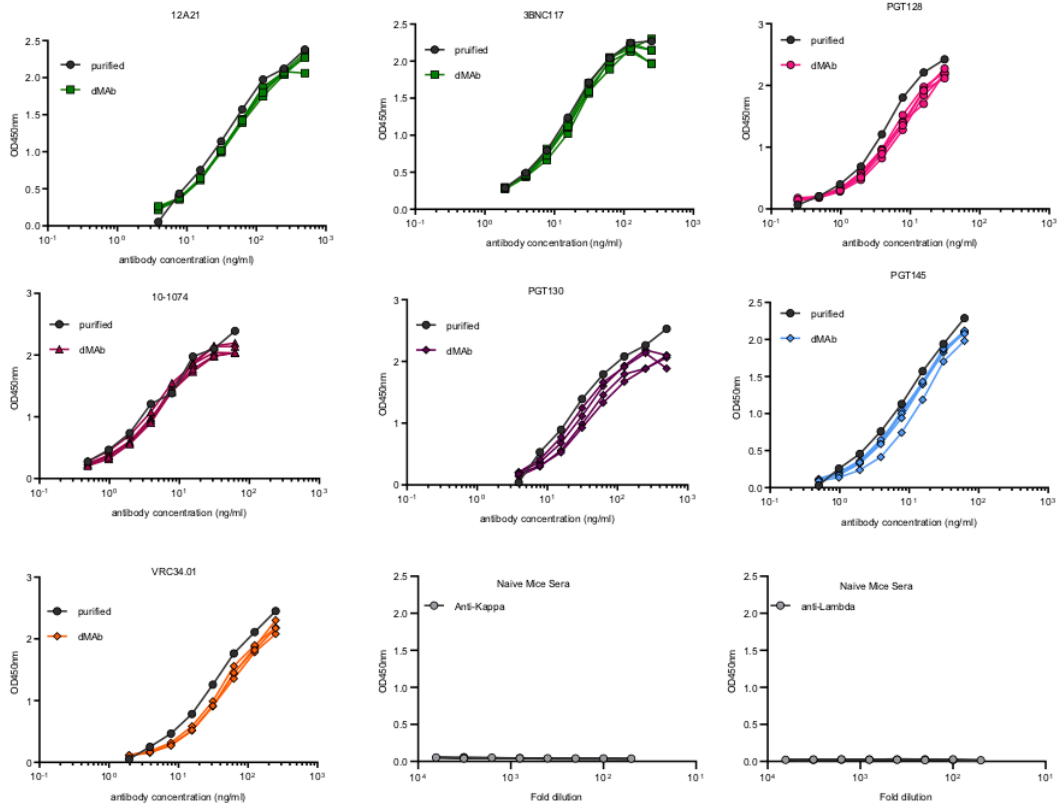

**B**

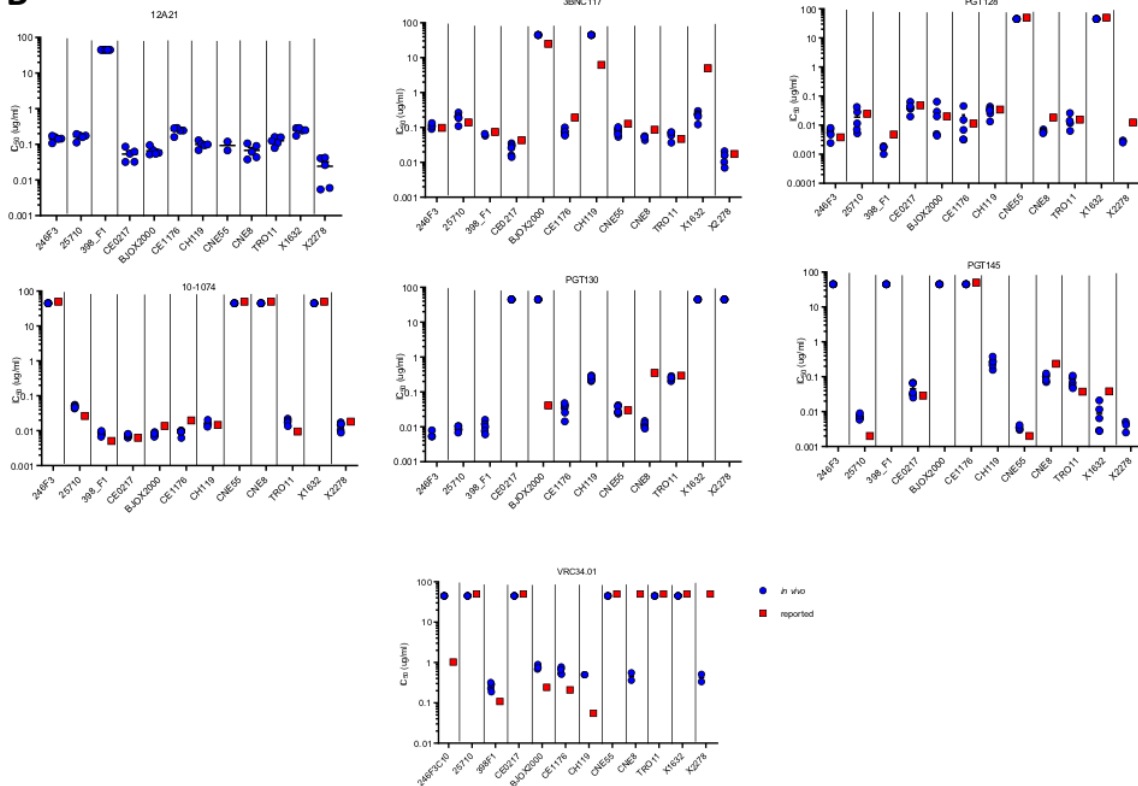

18 **Figure S3:** *Functionality of HIV-1 bNabs dMAbs produced in vivo.* (A) Binding curves of recombinant (black)  
19 and in vivo produced dMAbs (mice, Day 14, colors, n= 5) against HIV-1 Env trimer (BG505\_MD39). No  
20 trimer binding was detected using naïve mouse serum using the two secondary antibodies. (B) Individual  
21 mouse IC<sub>50</sub> across the 12-virus global panel (blue circles) vs values reported in the literature (red squares).  
22 Literature values gathered from Los Alamos CatNaber.  
23

24

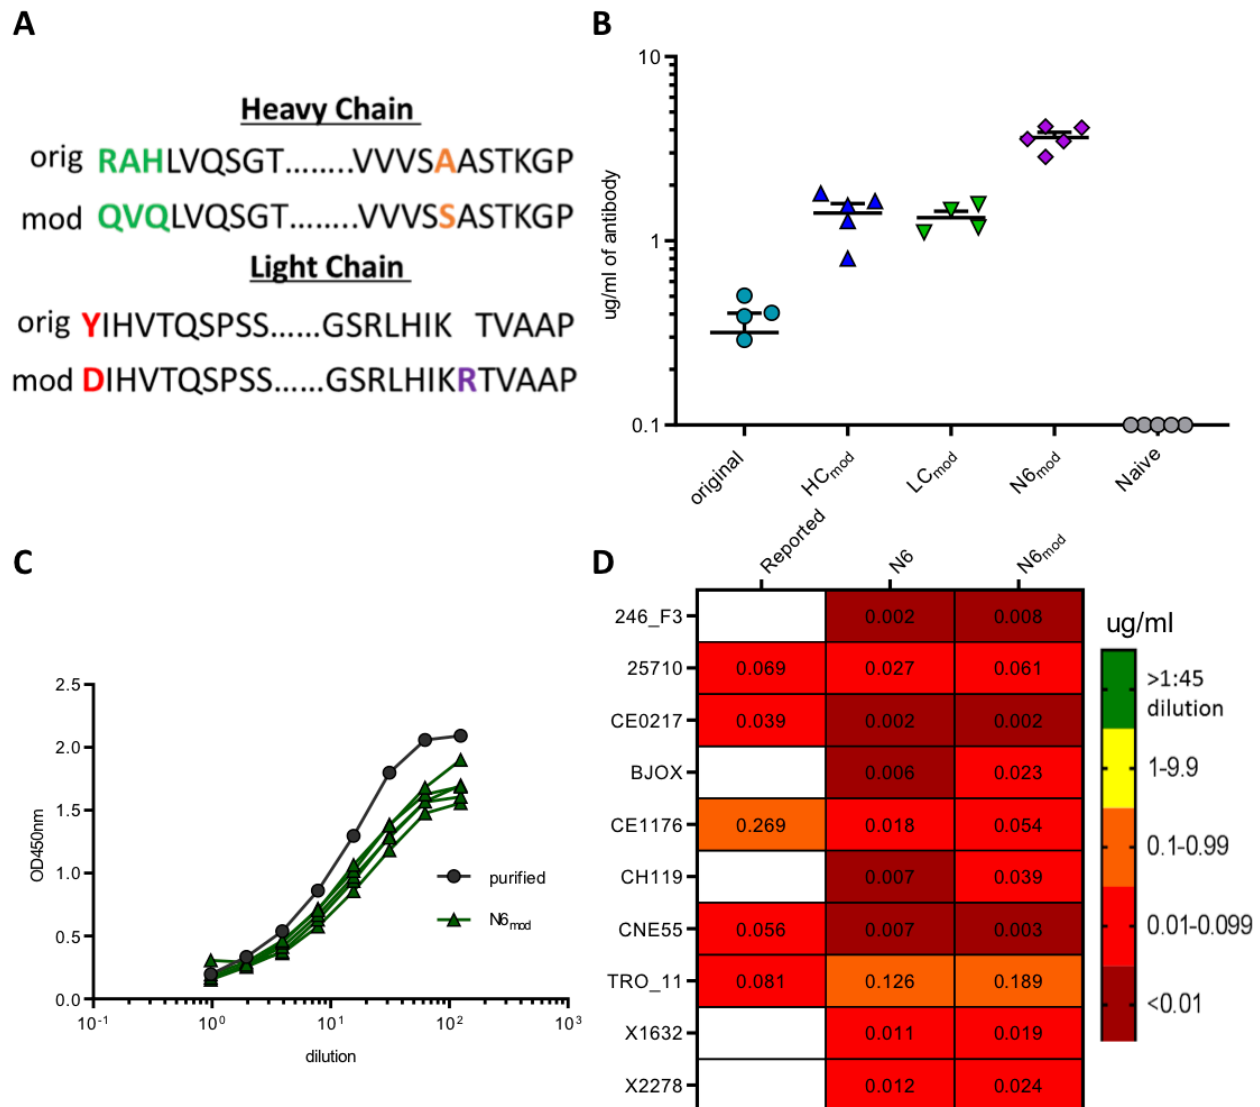

25

26 **Figure S4:** Amino acid sequence modifications to HIV-1 broadly neutralizing antibody N6 improve dMAb  
 27 expression *in vivo* without compromising N6 binding or function. (A) Modifications to the beginning and  
 28 end of the heavy and light chain amino acid sequence of human IgG1 monoclonal antibody N6 were  
 29 produced. These modifications were selected to make the antibody sequence more similar to the human  
 30 germline. (B) Groups of mice (n=5) were transiently immunodepleted and injected with plasmid DNA  
 31 expressing original N6, heavy chain (HC) modified + light chain (LC) original (HC<sub>mod</sub>), HC original + LC  
 32 modified (LC<sub>mod</sub>) or both HC and LC modified (N6<sub>mod</sub>). Expression levels of serum dMAb was determined

33 on Day 14. (C) Serum binding of N6<sub>mod</sub> (green, triangle) to HIV-1 envelope trimer BG505\_MD39 were  
34 compared to binding of purified monoclonal N6 original (black, circle). (D) Neutralization IC<sub>50</sub> (μg/mL) of  
35 recombinant N6 original vs N6<sub>mod</sub> against HIV-1 envelope pseudotype viruses representing 10 of the global  
36 panel in a TZM-bl assay. Reported values gather from Los Alamos CatNaber.

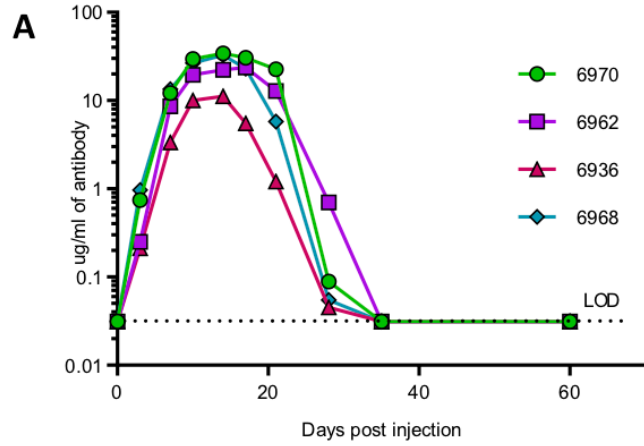

**B**

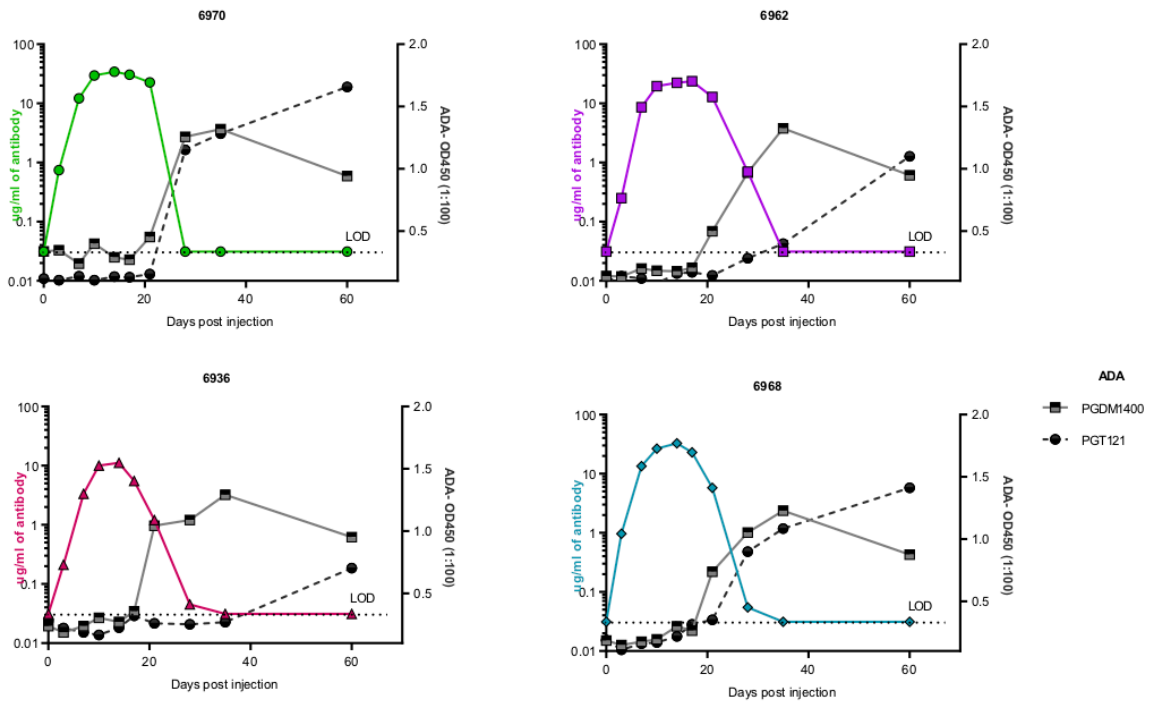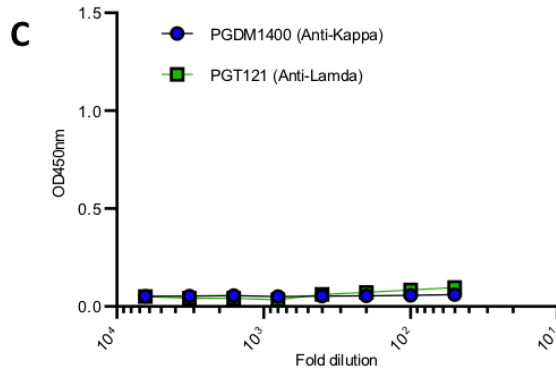



38 **Figure S5:** *Individual expression of human IgG1 and ADA development in group 1 dMAb administered*  
39 *NHPs.* NHPs were injected on D0 with dMAb expressing PGDM1400 only. **(A)** Expression kinetics of human  
40 IgG1 in NHP serum for each of the four NHPs. **(B)** Expression of human IgG (left y-axis) vs ADA (right y-  
41 axis) against PGDM1400 (which was administered as dMAb) and PGT121 (which was not administered to  
42 group 1) over time. Expression and ADA levels representative of two replications. **(C)** Serum binding curves  
43 against HIV-1 Env trimer, BG505\_MD39, using different secondary antibodies to establish the binding of  
44 PGDM1400 (human IgG1 kappa light chain, blue), and PGT121 (human IgG1 lambda light chain, green) for  
45 Day 0 pre-bleed serum.

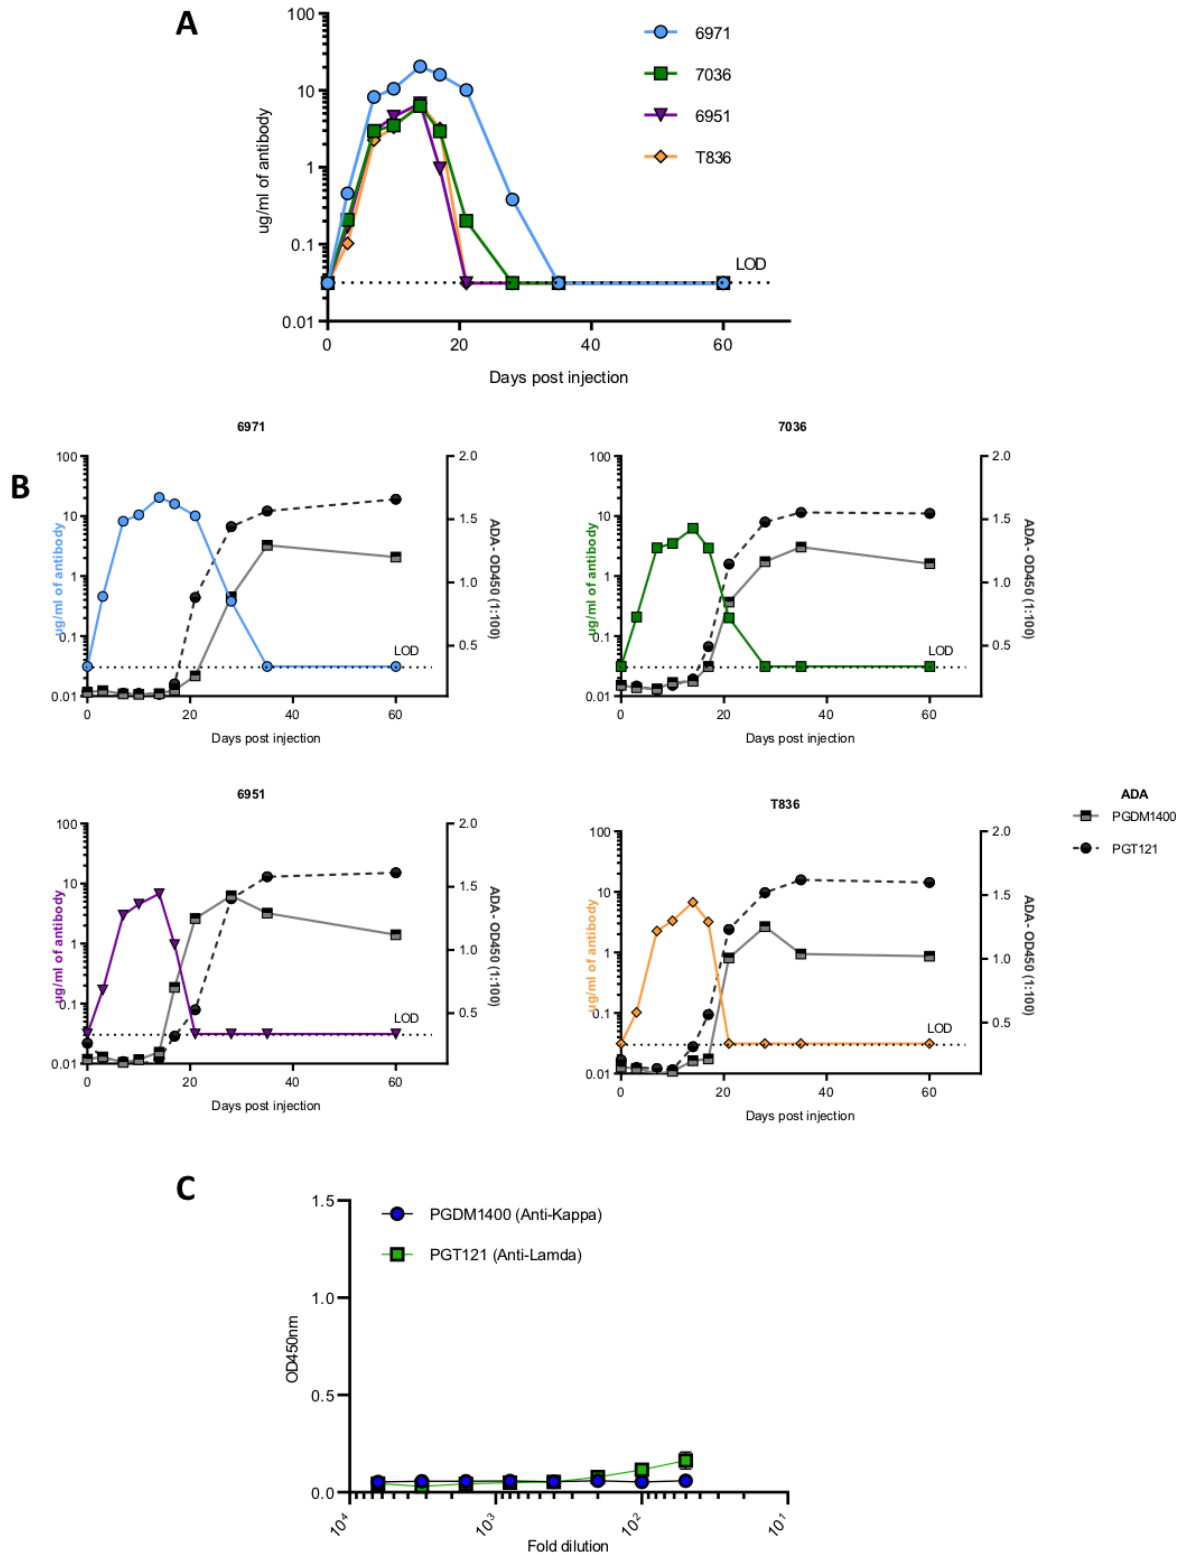

46

47 **Figure S6:** Individual expression of human IgG1 and ADA development in group 2 dMAb administered

48 NHPs. NHPs were injected on D0 with dMAbs expressing PGDM1400 and PGT121. (A) Expression kinetics

49 of human IgG1 in NHP serum for each of the four NHPs. **(B)** Expression of human IgG (left y-axis) vs ADA  
50 (right y-axis) against PGDM1400 (dMAb administered) and PGT121 (dMAb administered) over time.  
51 Expression and ADA levels representative of two replications. **(C)** Serum binding curves against HIV-1 Env  
52 trimer, BG505\_MD39, using different secondary antibodies to establish the binding of PGDM1400 (human  
53 IgG1 kappa light chain, blue), and PGT121 (human IgG1 lambda light chain, green) for Day 0 pre-bleed  
54 serum.  
55

56

**A**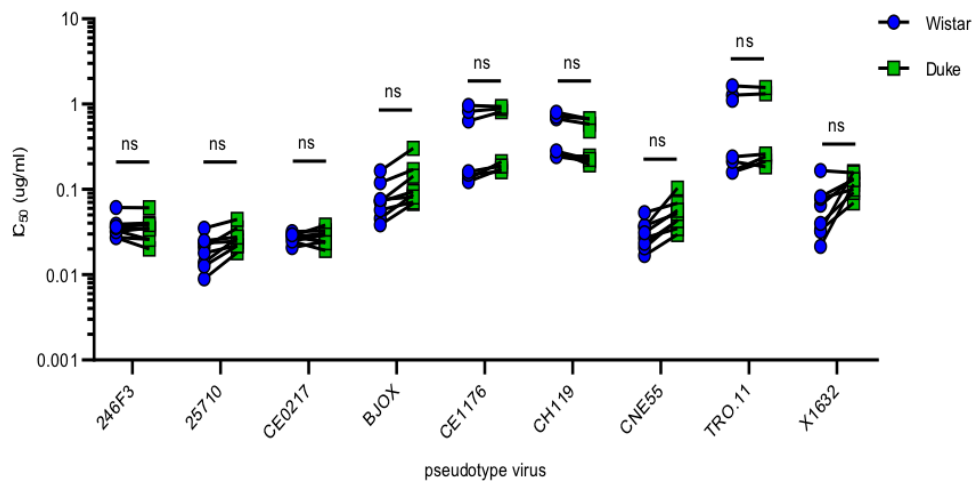**B**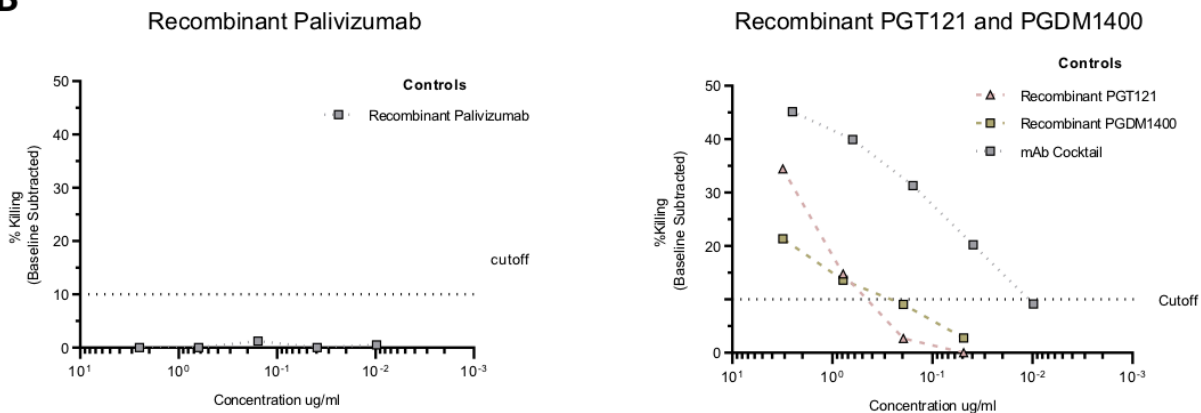

57

58 **Figure S7:** Similar neutralization titers ( $IC_{50}$ ) for groups 1 and 2 of NHP dMAb study between in-house and  
 59 collaborator assays and ADCC controls. **(A)** To validate neutralization titers observed at Wistar, serum  
 60 collected from NHPs at Days 0 and 14 were sent to Dr. Montefiori's group at Duke to cross-validate data  
 61 collected at Wistar. There was no significant difference between the  $IC_{50}$  titers determine between the  
 62 two groups for all nine viruses selected from the global panel. A modified ANOVA with post-hoc Tukey  
 63 test was performed to determine significant difference in titers between the two labs.  $P < 0.05$  was  
 64 considered significant. **(B)** The RSV-specific monoclonal antibody, Palivizumab, was used as a negative  
 65 control and a mixture of A32, CH44, 2G12, and 7B2 monoclonal antibodies were used as positive controls  
 66 for the ADCC assay.

|                  | Heavy Chain |          |             |                        | Light Chain |          |                 | Epitope |
|------------------|-------------|----------|-------------|------------------------|-------------|----------|-----------------|---------|
|                  | GeneBank    | Family   | CDR3 length | % AA somatic mutations | GeneBank    | Family   | Kappa or Lambda |         |
| <b>VRC01</b>     | GU980702    | IGHV1-2  | 14          | 42                     | GU980703    | IGLV1-33 | Kappa           |         |
| <b>N6</b>        | KX595108    | IGHV1-2  | 15          | 33                     | KX595112    | IGLV1-33 | Kappa           |         |
| <b>12A21</b>     | HE584541    | IGHV1-2  | 15          | 31                     | HE58451     | IGLV1-39 | Kappa           |         |
| <b>3BNC117</b>   | HE584537    | IGHV1-2  | 12          | 35                     | HE584538    | IGLV1-33 | Kappa           |         |
| <b>IOMA</b>      | KX610770    | IGHV1-2  | 19          | 18                     | KX610771    | IGLV2-23 | Lambda          |         |
| <b>NIH45-46</b>  | HE584543    | IGHV1-2  | 18          | 41                     | HE584544    | IGLV3-11 | Kappa           | CD4BS   |
| <b>PGT121</b>    | JN201894    | IGHV4-59 | 26          | 24                     | JN201911    | IGLV3-21 | Lambda          |         |
| <b>PGT128</b>    | JN201900    | IGHV4-39 | 21          | 30                     | JN201917    | IGLV2-8  | Lambda          |         |
| <b>10-1074</b>   | 4FQ2_H      | IGHV4-59 | 26          | 21                     | 4FQ2_L      | IGLV3-9  | Lambda          |         |
| <b>PGT130</b>    | JN201901    | IGHV4-38 | 21          | 22                     | JN201918    | IGLV2-8  | Kappa           |         |
| <b>PGT145</b>    | JN201910    | IGHV1-8  | 33          | 28                     | JN201927    | IGLV2-28 | Kappa           |         |
| <b>PGDM 1400</b> | KP006370    | IGHV1-8  | 35          | 28                     | KP006383    | IGLV2-28 | Kappa           |         |
| <b>PG9</b>       | GU272045    | IGHV3-33 | 30          | 19                     | GU272046    | IGLV2-14 | Lambda          |         |
| <b>PGT151</b>    | KJ700282    | IGHV3-30 | 28          | 28                     | KJ700290    | IGLV2-29 | Kappa           |         |
| <b>35O22</b>     | KM001872    | IGHV1-18 | 24          | 34                     | KM001880    | IGLV2-14 | Lambda          |         |
| <b>VRC3401</b>   | KU711816    | IGHV1-2  | 15          | 20                     | KU711823    | IGLV1-9  | Kappa           | Fusion  |

67

68 **Table S1:** GenBank accession numbers used for the basis of HIV-1 dMAbs.

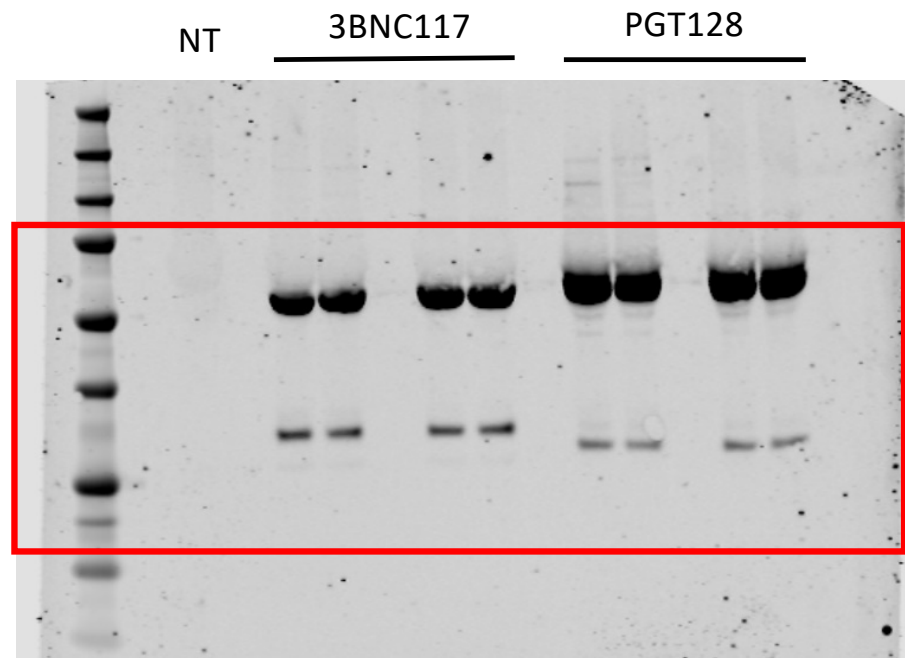

Full unedited gel for Supplemental Figure 1C: Detection antibody used – IRDye-680 anti-human secondary antibody (LI-COR Bioscience)

Red box indicates the area used for the figure.
